# Supplementary material for: Physapruin A Induces Reactive Oxygen Species to Trigger Cytoprotective Autophagy of Breast Cancer Cells
Source: MDPI journal article supplement (doi:10.3390/antiox11071352), 2022-07-11
Supplement: s1 [file s1]

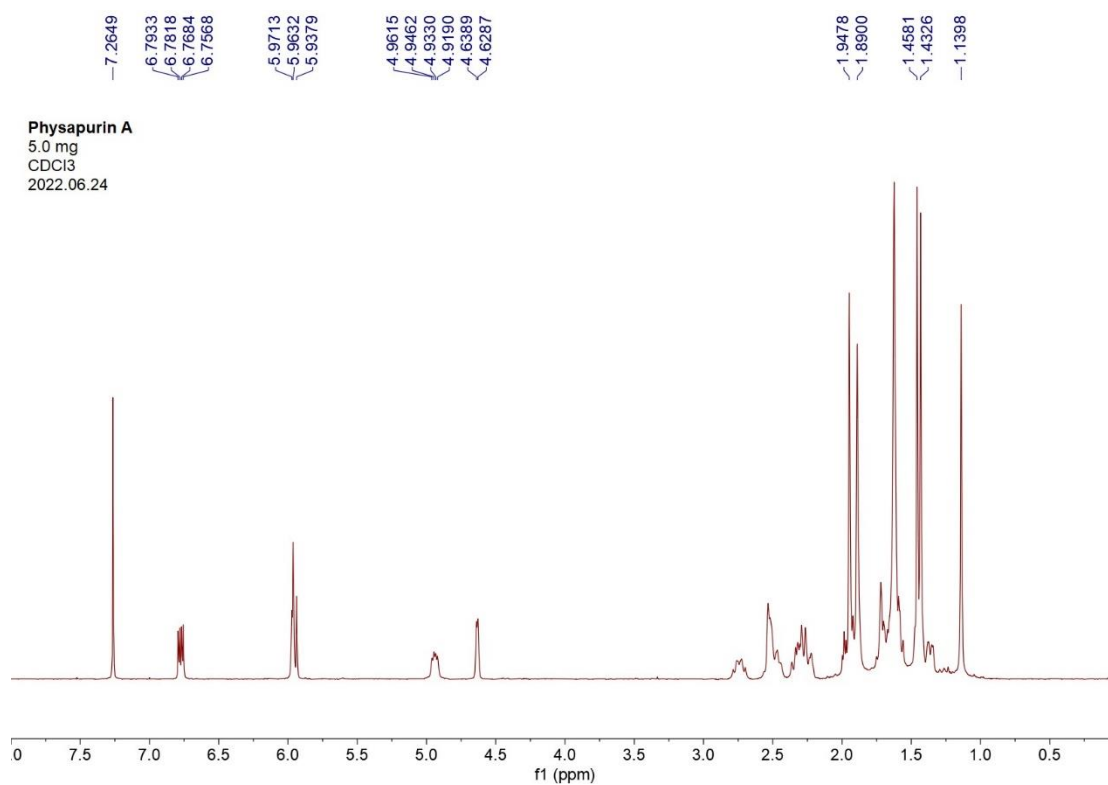

**Figure S1.** The  $^1\text{H}$  NMR spectrum of PHA purchased from BioBioPha Co. (Yunnan, China). This spectrum matched the data for PHA in our previous work [12] and showed high purity (no impurity peaks).
